# Supplementary material for: MiR-199a/b-5p inhibits hepatocellular carcinoma progression by post-transcriptionally suppressing ROCK1
Source: PubMed Central journal article supplement (PMC5620164; doi:10.18632/oncotarget.18052), 2017-05-22
Supplement: oncotarget-08-67169-s001.pdf [file oncotarget-08-67169-s001.pdf]

## **MiR-199a/b-5p inhibits hepatocellular carcinoma progression by post-transcriptionally suppressing ROCK1**

### **SUPPLEMENTARY MATERIALS AND METHODS**

#### **Colony formation assay**

For colony formation assays, 500 HCC cells transfected with miR-199a/b-5p or miR-NC mimics were plated in 35 mm culture dish and incubated at 37°C for 2 weeks. Then, the cells were washed twice with phosphate-buffered saline (PBS), fixed in 2ml 4% paraformaldehyde

for 30 min and further stained with 1ml 0.1% crystal violet for 20 min followed by 3 washes with ddH<sub>2</sub>O. The plates were then photographed and analyzed.

#### **Wound healing assay**

For wound healing assays, HCC cells were cultured to form a monolayer in 6-well plates. The monolayer was manually scratched with a pipette tip to form a wound and observed under an inverted microscope at 0 and 24h to analyze the extent of healing.

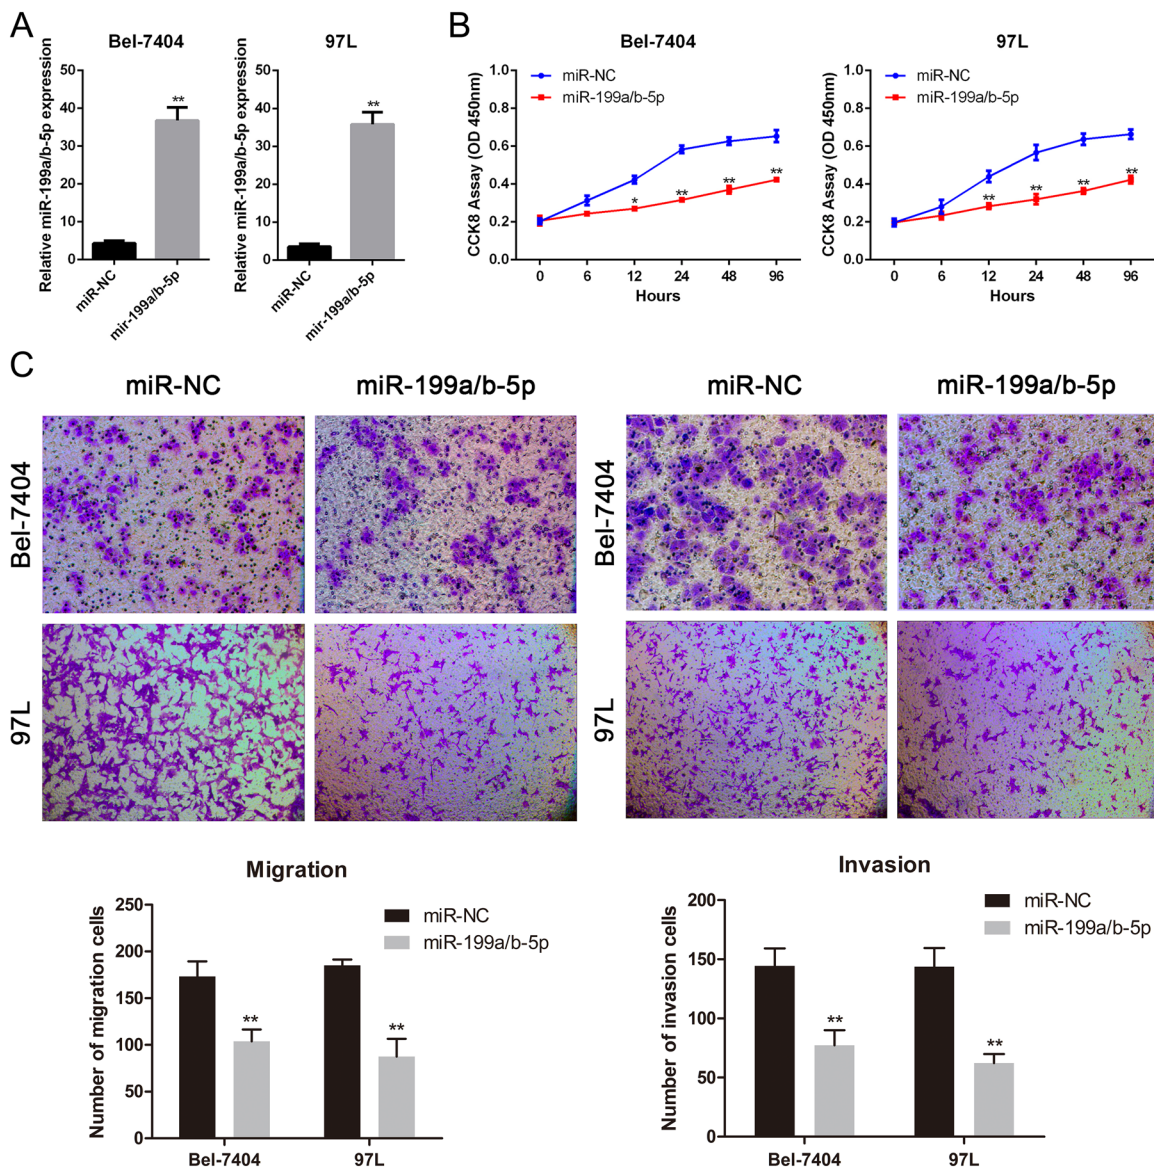

**Supplementary Figure 1: Related to Figure 3.** (A) The relative expression of miR-199a/b-5p in Bel-7404 and 97L cells transfected with 80nM miR-199a/b-5p mimics (1:1) or control. (B) Estimation of cell proliferation in Bel-7404 and 97L cells transfected with control or miR-199a/b-5p mimics by cell counting kit-8 (CCK-8) assays. (C) Transwell assays determining cell migration and invasion potential of Bel-7404 and 97L cell lines transfected with control or miR-199a/b-5p mimics. The results were expressed as mean ± SD (\*p<0.05, \*\*p<0.01).

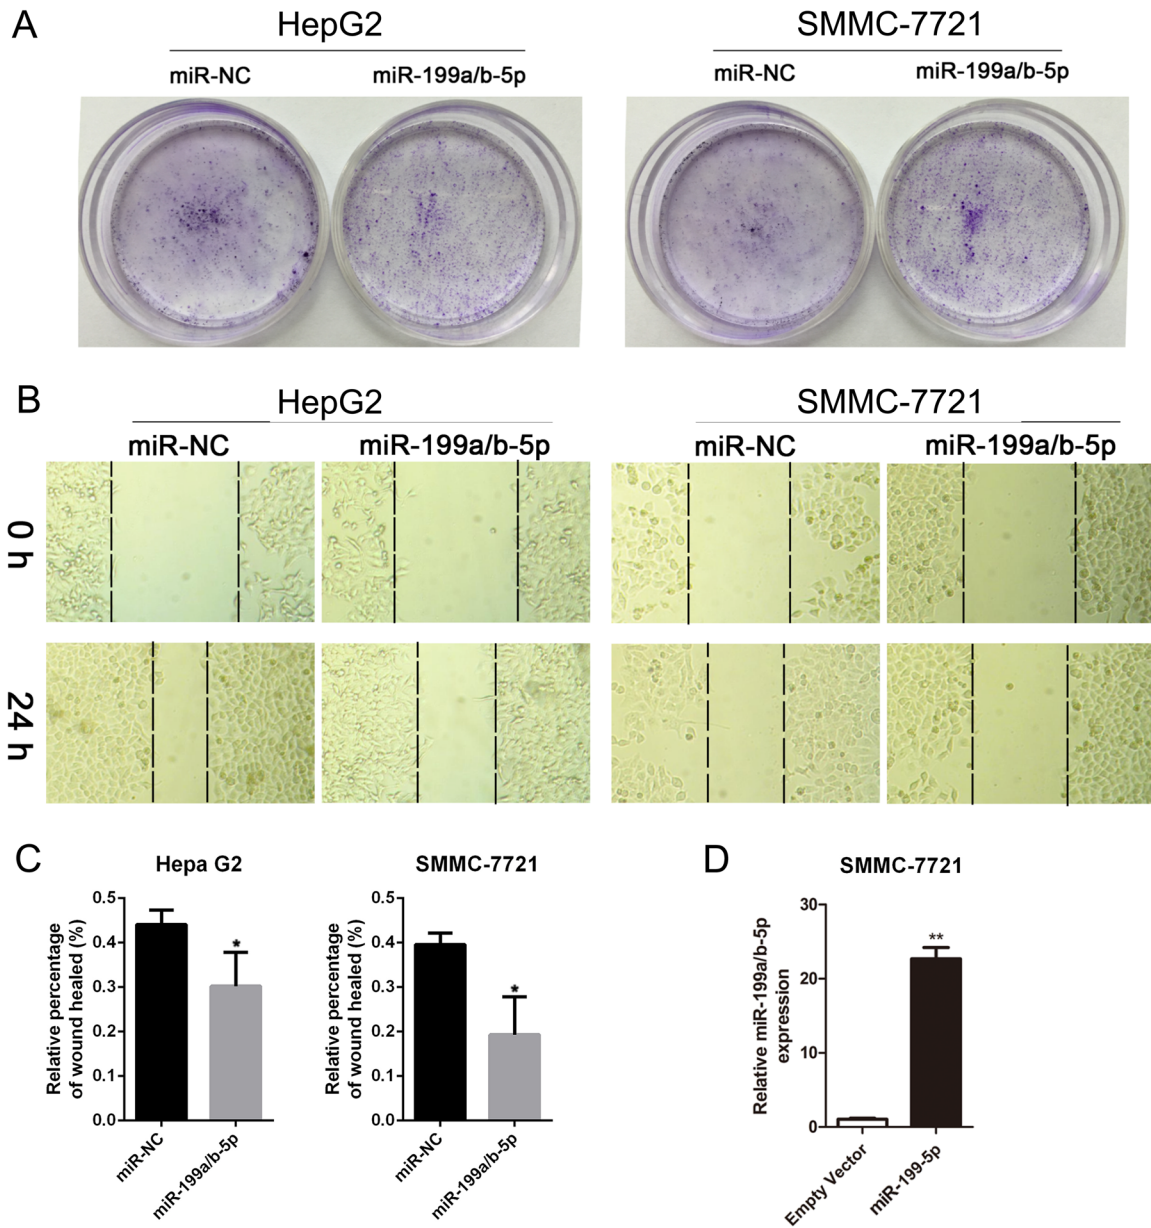

**Supplementary Figure 2: Related to Figure 3.** (A) Plate colony formation assays estimating cell proliferation in HepG2 and SMMC-7721 cell lines transfected with control or miR-199a/b-5p mimics. (B, C) Wound-healing assays measuring the cell motility of HepG2 and SMMC-7721 cell lines transfected with control or miR-199a/b-5p mimics. (D) qRT-PCR analysis of miR-199a/b-5p mRNA levels after miR-199-5p stable overexpression in SMMC-7721. The results were expressed as mean  $\pm$  SD (\* $p$ <0.05, \*\* $p$ <0.01).

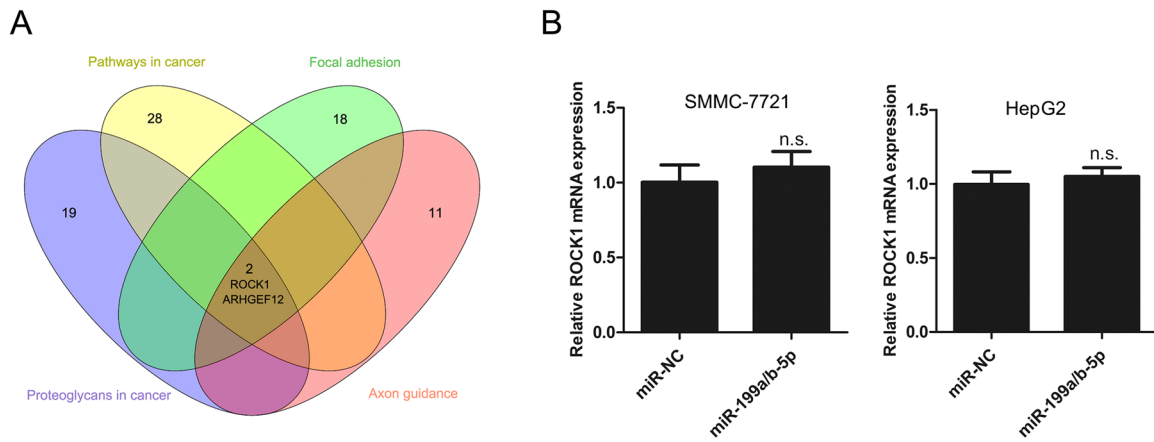

**Supplementary Figure 3: Related to Figure 4.** (A) ROCK1 and ARHGEF12 were found in the 4 most enriched cell signaling pathways by KEGG pathway enrichment analysis. (B) qRT-PCR analysis of ROCK1 mRNA levels after transfection with miR-199a/b-5p and miR-NC mimics in SMMC-7721 and HepG2 cells. The results were expressed as mean ± SD (\*p<0.05, \*\*p<0.01).

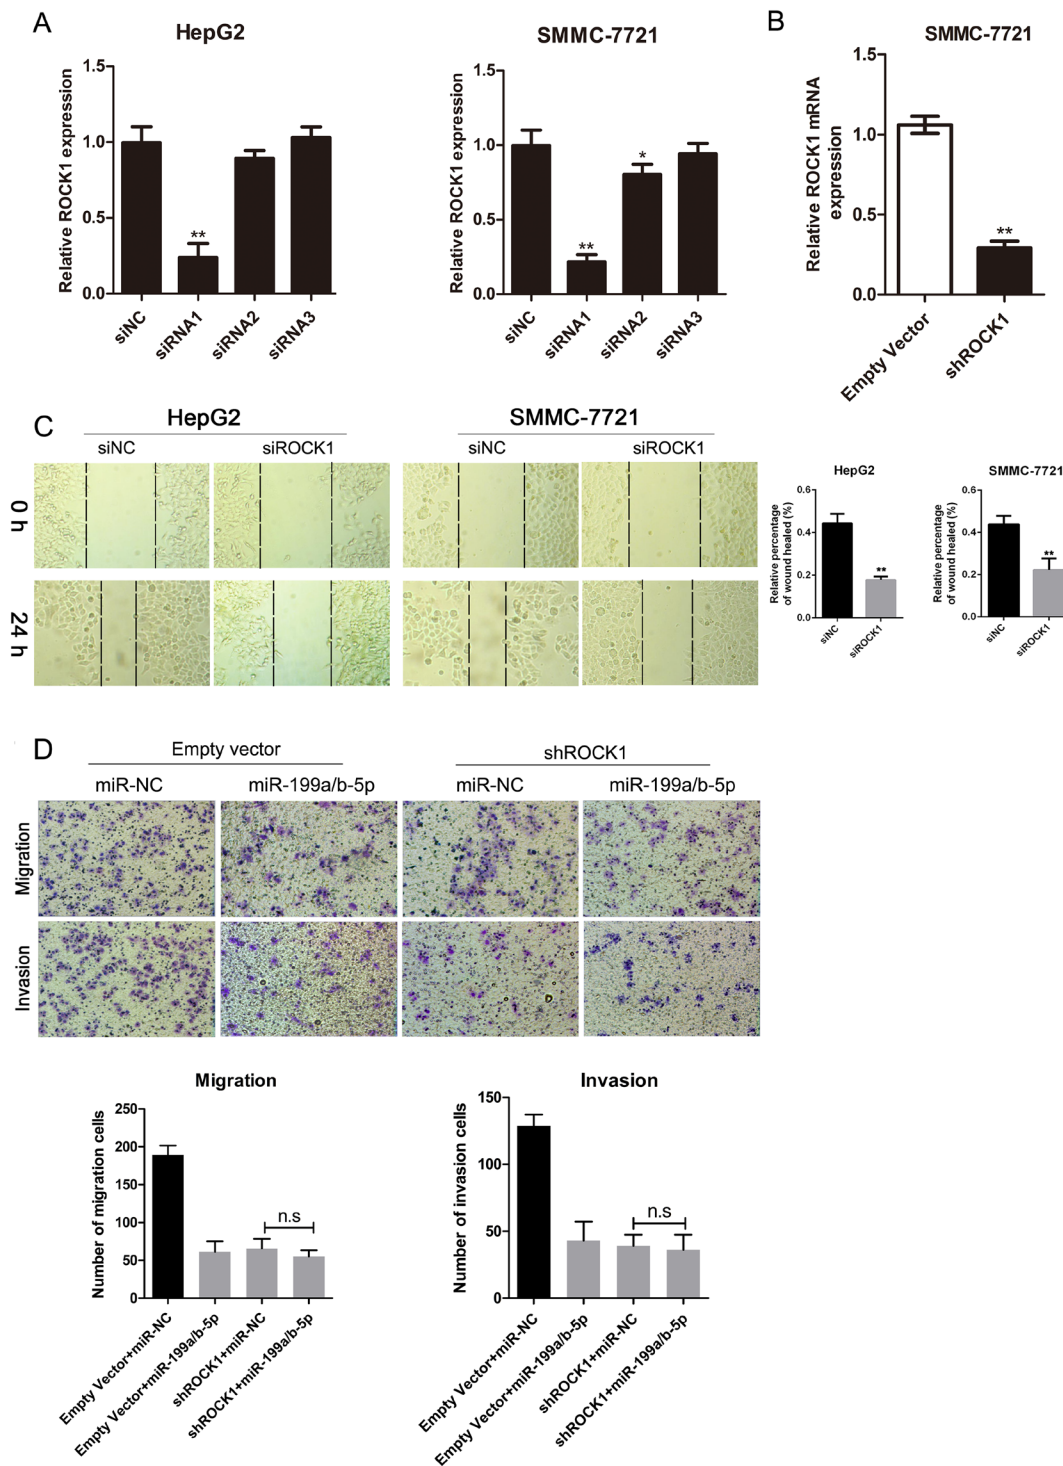

**Supplementary Figure 4: Related to Figure 4.** (A) qRT-PCR analysis of ROCK1 mRNA levels after transfection with three different siRNAs and siNC in HepG2 and SMMC-7721 cells. (B) qRT-PCR analysis of ROCK1 mRNA levels after transfection with empty vector and shROCK1 in SMMC-7721 cells. (C) Wound-healing assays measuring the cell motility of HepG2 and SMMC-7721 cell lines transfected with siNC or siROCK1. (D) Transwell assays determining cell migration and invasion potential of ROCK1 knockdown SMMC-7721 cells and control cells transfected with miR-NC or miR-199a/b-5p. The results were expressed as mean ± SD (\*p<0.05, \*\*p<0.01, n.s means no significance).

Supplementary Table 1: Related to Figure 1A, up/down-regulated miRNAs in HCC and matched normal liver tissues

| miRNA      | Average reads in normal liver | Average reads in HCC samples | Log <sub>2</sub> (T/N) | LogCPM      | P value     | FDR      |
|------------|-------------------------------|------------------------------|------------------------|-------------|-------------|----------|
| miR-199a-2 | 15,049                        | 2,381                        | -2.0698204             | 12.41773769 | 4.05E-06    | 6.86E-06 |
| miR-199b   | 17,749                        | 2,802                        | -2.0684283             | 12.66089174 | 4.43E-06    | 7.20E-06 |
| miR-199a-1 | 9,099                         | 1,468                        | -2.0519113             | 11.69227063 | 1.51E-06    | 2.80E-06 |
| miR-139    | 3,100                         | 415                          | -2.0484013             | 10.15196109 | 2.46E-10    | 1.20E-09 |
| miR-424    | 4,708                         | 866                          | -2.0269011             | 8.804521073 | 2.04E-12    | 4.75E-10 |
| miR-142    | 20,581                        | 4,366                        | -1.8740857             | 10.98989967 | 2.16E-09    | 1.19E-07 |
| miR-150    | 3,914                         | 813                          | -1.6809660             | 10.62874728 | 1.36E-07    | 3.35E-07 |
| miR-130a   | 850                           | 150                          | -1.6777246             | 8.358254581 | 7.70E-10    | 3.34E-09 |
| miR-451    | 14,160                        | 2,120                        | -1.6745600             | 12.19902774 | 4.54E-05    | 7.08E-05 |
| miR-145    | 15,077                        | 3,895                        | -1.4136317             | 10.48896715 | 1.02E-05    | 0.000197 |
| miR-486    | 2,162                         | 469                          | -1.3137192             | 7.460127489 | 1.47E-05    | 0.00027  |
| miR-10a    | 217,097                       | 67,510                       | -1.1865342             | 14.46930259 | 0.001433    | 0.012487 |
| miR-146b   | 8,415                         | 13,722                       | 1.3343589              | 13.20244    | 0.003382206 | 0.004122 |
| miR-425    | 667                           | 1,058                        | 1.4746675              | 9.590966    | 1.06E-08    | 3.43E-08 |
| miR-210    | 1,717                         | 2,752                        | 1.5007599              | 10.98051    | 0.000748986 | 0.001037 |
| miR-30d    | 47,370                        | 68,051                       | 1.5159854              | 15.76871    | 2.21E-06    | 3.92E-06 |
| miR-320a   | 1,912                         | 3,355                        | 1.6095479              | 11.1841     | 5.77E-07    | 1.13E-06 |
| miR-25     | 34,645                        | 55,384                       | 1.6127962              | 15.34372    | 6.85E-09    | 2.43E-08 |
| miR-338    | 1,572                         | 3,291                        | 1.6660130              | 10.95378    | 0.00016511  | 0.000248 |
| miR-151    | 13,406                        | 22,558                       | 1.7731376              | 14.15701    | 1.37E-07    | 3.35E-07 |
| miR-500a   | 873                           | 1,524                        | 1.7780683              | 10.19433    | 6.04E-09    | 2.36E-08 |
| miR-93     | 10,892                        | 19,411                       | 1.7830911              | 13.83593    | 1.50E-07    | 3.45E-07 |
| miR-21     | 492,611                       | 1,006,951                    | 1.9505564              | 19.52629    | 1.37E-08    | 4.12E-08 |
| miR-452    | 423                           | 1,677                        | 2.6688992              | 9.963142    | 1.22E-10    | 6.81E-10 |
| miR-217    | 913                           | 13,125                       | 4.3508002              | 12.46674    | 1.19E-10    | 6.81E-10 |
| miR-182    | 6,424                         | 89,884                       | 4.5038293              | 15.53287    | 3.09E-17    | 5.66E-16 |
| miR-10b    | 12,656                        | 188,862                      | 4.7526090              | 16.77752    | 4.35E-17    | 5.66E-16 |
| miR-183    | 1,752                         | 40,683                       | 5.2025714              | 14.36661    | 2.70E-19    | 1.05E-17 |
| miR-9-1    | 331                           | 7,674                        | 6.0367556              | 12.6403     | 9.81E-13    | 7.65E-12 |
| miR-10b    | 12,656                        | 188,862                      | 4.7526090              | 16.77752    | 4.35E-17    | 5.66E-16 |
| miR-9-2    | 326                           | 7,626                        | 4.620394096            | 9.239508317 | 8.59E-11    | 8.98E-09 |

**Supplementary Table 2: Related to Fig4, 621 putative targets of miR-199-5p predicted by Targetscan**

See Supplementary File 1

**Supplementary Table 3: Related to Figure 4, enrichment of analysis of predicted miR-199a/b-3p targets in KEGG cell signaling pathway database**

| Pathway                                                  | Counts | p value  |
|----------------------------------------------------------|--------|----------|
| Proteoglycans in cancer                                  | 19     | 1.12E-05 |
| Pathways in cancer                                       | 28     | 1.21E-05 |
| Focal adhesion                                           | 18     | 6.05E-05 |
| Axon guidance                                            | 11     | 0.002919 |
| Hippo signaling pathway                                  | 12     | 0.003362 |
| Protein processing in endoplasmic reticulum              | 12     | 0.007813 |
| TGF-beta signaling pathway                               | 8      | 0.009023 |
| Circadian rhythm                                         | 5      | 0.010471 |
| Endocytosis                                              | 15     | 0.013531 |
| Arrhythmogenic right ventricular cardiomyopathy (ARVC)   | 7      | 0.014306 |
| Chronic myeloid leukemia                                 | 7      | 0.015254 |
| Signaling pathways regulating pluripotency of stem cells | 10     | 0.016711 |
| Basal cell carcinoma                                     | 6      | 0.018516 |
| MAPK signaling pathway                                   | 14     | 0.026912 |
| TNF signaling pathway                                    | 8      | 0.029111 |
| Small cell lung cancer                                   | 7      | 0.031743 |
| Regulation of actin cytoskeleton                         | 12     | 0.034896 |
| ErbB signaling pathway                                   | 7      | 0.035025 |
| Renal cell carcinoma                                     | 6      | 0.035192 |
| Pancreatic cancer                                        | 6      | 0.035192 |

Only the most enriched 20 cell signaling pathways of predicted miR-199a/b-3p targets in KEGG database were shown. A hypergeometric test was used to validate the significance with p value shown as indicated.
